# Supplementary material for: Psychological factors substantially contribute to biological aging: evidence from the aging rate in Chinese older adults
Source: publisher site journal article supplement (doi:10.18632/aging.204264), 2022-09-27
Supplement: Supplementary file [file aging-v14i18-204264-supplementary-material-SD1.pdf]

## SUPPLEMENTARY FIGURES

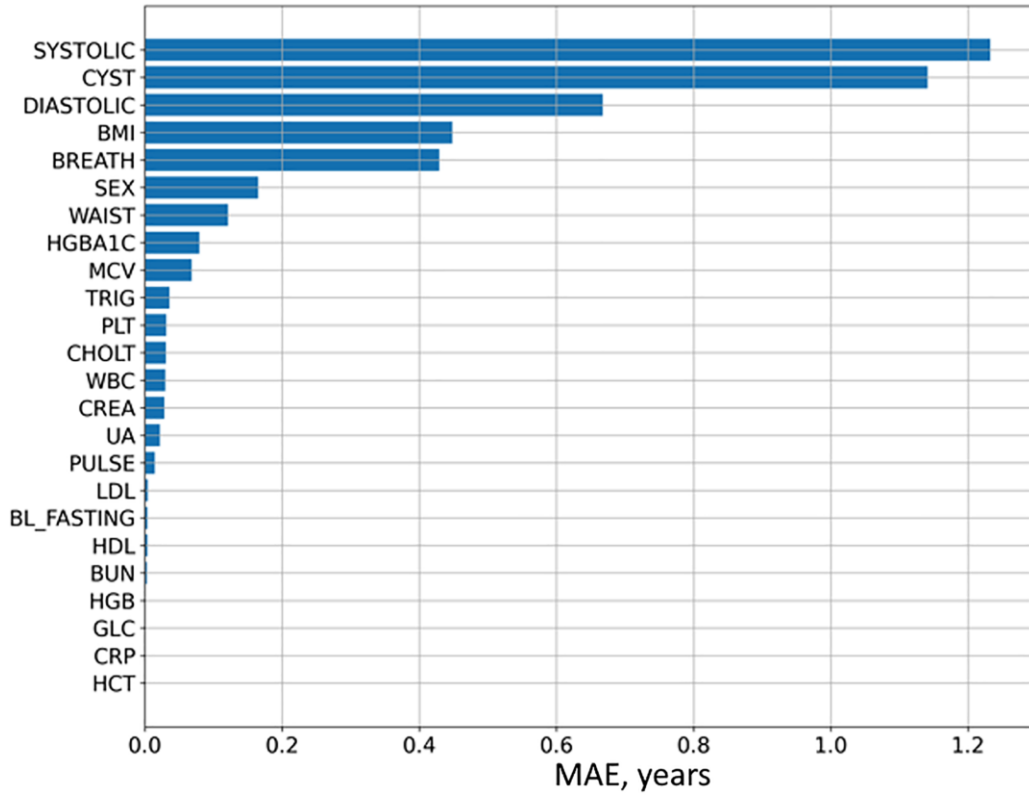

**Supplementary Figure 1. Permutation feature importance analysis was carried out to determine the features our aging clock pays the most attention to during age prediction.** The importance of a feature is judged based on the drop in the MAE of the model when a feature's value is shuffled in the test set.

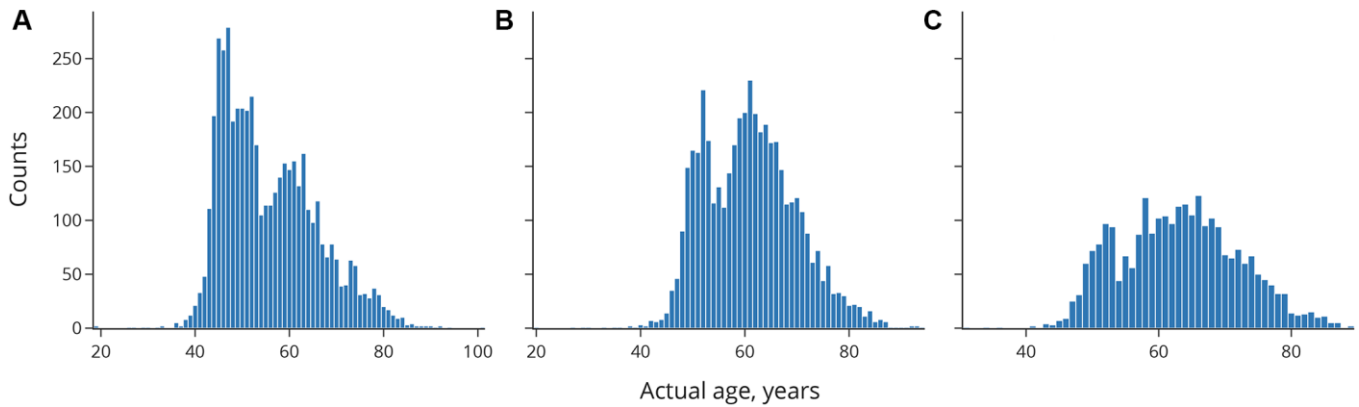

**Supplementary Figure 2. Age distribution in the three cohorts used in this study.** (A) Training set ( $N = 4846$ ), mean age is 55.7 years (B) Test set ( $N = 4451$ ), mean age is 61.0 years (C) Discovery set ( $N = 2617$ ), mean age is 63.0 years.
