# Supplementary material for: Psychological factors substantially contribute to biological aging: evidence from the aging rate in Chinese older adults
Source: publisher site journal article supplement (doi:10.18632/aging.204264), 2022-09-27
Supplement: Supplementary file [file aging-v14i18-204264-supplementary-material-SD2.pdf]

## SUPPLEMENTARY TABLES

Supplementary Table 1. The prevalence of the conditions used in the elastic net importance analysis section.

| Feature                    | Percent positive |
|----------------------------|------------------|
| Is male                    | 45.90%           |
| Is married                 | 89.15%           |
| Is widowed                 | 9.25%            |
| Is rural                   | 73.93%           |
| Current smoker             | 28.37%           |
| Bothered by things is rare | 55.45%           |
| Lack of focus is rare      | 56.53%           |
| Depression is rare         | 55.43%           |
| Hopeful is rare            | 29.32%           |
| Fearful is rare            | 83.32%           |
| Restless sleep is rare     | 53.14%           |
| Happiness is rare          | 19.05%           |
| Loneliness is rare         | 74.88%           |
| Total <i>N</i>             | 9297             |

The statistics are derived from the training and test sets only.

Supplementary Table 2. The mean values and standard deviations (std) of the variables used by the age predictor.

| Variable name           | Mean   | Std   | Units   |
|-------------------------|--------|-------|---------|
| White blood cells       | 5.98   | 2.06  | x10E9/L |
| Hemoglobin              | 137.28 | 19.22 | g/L     |
| Hematocrit              | 41.50  | 5.58  | %       |
| Mean corpuscular volume | 91.28  | 7.70  | fL      |
| Platelets               | 205.31 | 74.14 | x10E9/L |
| Triglycerides           | 1.61   | 1.03  | mmol/L  |
| Creatinine              | 70.96  | 24.05 | umol/L  |
| Blood urea nitrogen     | 5.48   | 1.63  | mmol/L  |
| HDL cholesterol         | 1.32   | 0.29  | mmol/L  |
| LDL cholesterol         | 2.64   | 0.74  | mmol/L  |
| Total cholesterol       | 4.75   | 0.93  | mmol/L  |
| Glucose                 | 5.70   | 1.87  | mmol/L  |
| Uric acid               | 0.29   | 0.08  | mmol/L  |
| Cystatin C              | 0.84   | 0.23  | mg/L    |
| C reactive protein      | 2.57   | 5.31  | mg/L    |
| Glycated hemoglobin     | 5.96   | 0.96  | %       |
| Systolic pressure       | 127.59 | 19.64 | mmHg    |
| Diastolic pressure      | 75.61  | 11.63 | mmHg    |
| Heart rate              | 73.98  | 10.53 | bpm     |

|                            |        |        |                   |
|----------------------------|--------|--------|-------------------|
| <b>BMI</b>                 | 23.95  | 3.63   | kg/m <sup>2</sup> |
| <b>Spirometry</b>          | 296.03 | 117.63 | L/min             |
| <b>Waist circumference</b> | 86.36  | 10.4   | cm                |
| <b>Total N</b>             |        | 11914  |                   |

---

The statistics are calculated based on the total study sample including training, test, and discovery sets.
